# Supplementary material
Source: PubMed Central journal article supplement (PMC6415549)
Supplement: NIHMS1010690-supplement-Supplemental_Data.pdf [file NIHMS1010690-supplement-Supplemental_Data.pdf]

## SUPPLEMENTAL INFORMATION

**TITLE:** Reduced axonal surface expression and phosphoinositide sensitivity in  $K_v7$  channels disrupts their function to inhibit neuronal excitability in *Kcnq2* epileptic encephalopathy.

**AUTHOR:** Eung Chang Kim<sup>1</sup>, Jiaren Zhang<sup>1</sup>, Weilun Pang<sup>1,\*</sup>, Shuwei Wang<sup>1,\*</sup>, Kwan Young Lee<sup>1</sup>, John P. Cavaretta<sup>1</sup>, Jennifer Walters<sup>1</sup>, Erik Procko<sup>2,3</sup>, Nien-Pei Tsai<sup>1,3</sup>, and Hee Jung Chung<sup>1,3</sup>

<sup>1</sup>Department of Molecular and Integrative Physiology, <sup>2</sup>Department of Biochemistry,

<sup>3</sup>Neuroscience Program, and University of Illinois at Urbana-Champaign, Urbana, Illinois 61801, USA.

\*These authors contributed equally.

**CORRESPONDING AUTHOR:** Hee Jung Chung

Department of Molecular and Integrative Physiology,

University of Illinois at Urbana-Champaign,

407 South Goodwin Avenue, 524 Burrill Hall, Urbana, IL 61801, USA.

Telephone number: (217) 244-6839

Email: chunghj@life.illinois.edu; chunghj@illinois.edu

**SUPPLEMENTAL FIGURES**

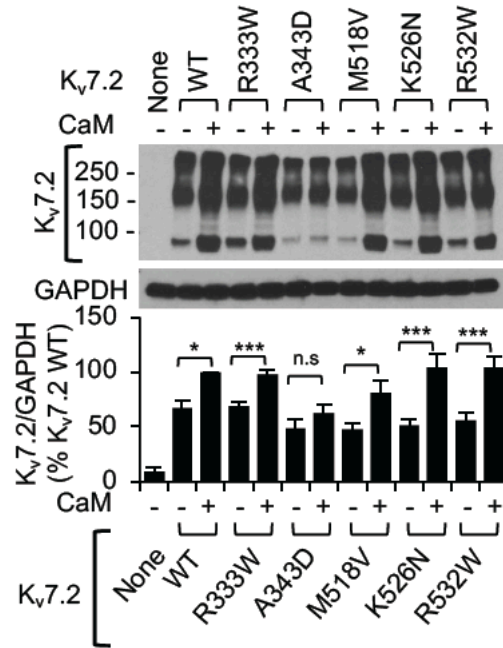

**Supplemental Figure 1. Effect of calmodulin on K<sub>v</sub>7.2 expression in HEK293T cells.**

HEK293T cells were transfected with untagged calmodulin (CaM) and wild type K<sub>v</sub>7.2 (WT) or K<sub>v</sub>7.2 containing epileptic encephalopathy mutations. Immunoblots of cell lysate was performed and quantified (n=4 independent experiments). GAPDH was used as a loading control. Data shown represent the Ave ± SEM (\*p<0.05, \*\*\*p<0.005). n.s. denotes “not significant”.

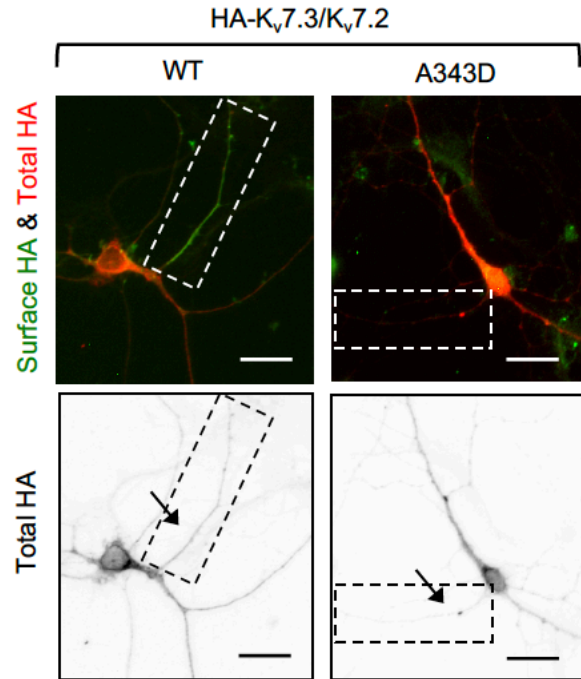

**Supplemental Figure 2. The A343D mutation blocks axonal expression of heteromeric K<sub>v</sub>7 channels in cultured hippocampal neurons.** Immunocytochemistry showing surface and total HA-K<sub>v</sub>7.3 proteins in hippocampal neurons cotransfected with K<sub>v</sub>7.2 WT or K<sub>v</sub>7.2 containing A343D mutation in CaM contact site of helix A. The A343D mutation impairs HA-K<sub>v</sub>7.3/ K<sub>v</sub>7.2 channel expression in the axonal surface and intracellularly in the axon.

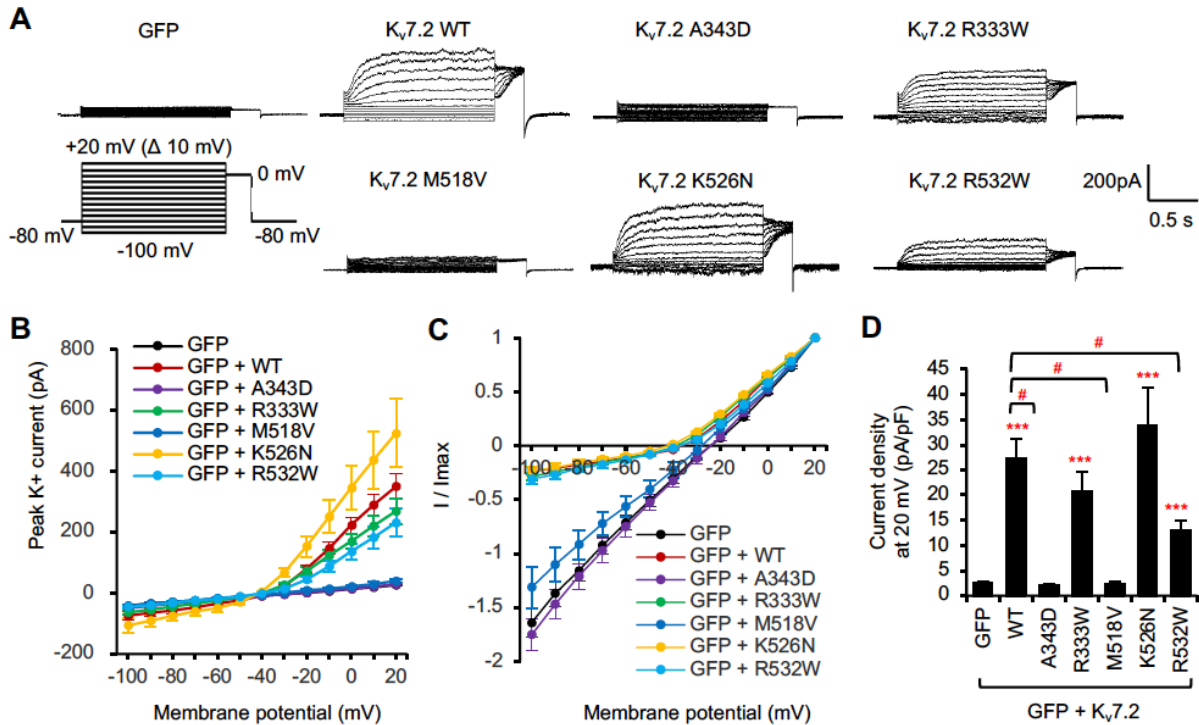

**Supplemental Figure 3. Whole cell patch clamp recording of CHO hm1 cells transfected wild-type  $K_v7.2$  or mutant  $K_v7.2$  harboring epileptic encephalopathy mutations.** Whole cell voltage clamp recording of macroscopic  $K^+$  currents from CHO hm1 cells transfected with GFP and  $K_v7.2$  WT or  $K_v7.2$  containing epileptic encephalopathy mutations. The cells were held at -80 mV. Currents were evoked by depolarization for 1.5 s from -100 mV to +20 mV in 10 mV increments, followed by a step to 0 mV for 300 ms. The patch pipette solution contained EGTA to sequester free  $Ca^{2+}$ . **(A)** Representative traces. **(B)** Average peak currents at all voltage steps. **(C)** Normalized current at all voltage steps. **(D)** Average peak current densities at +20 mV. Leak subtracted current traces and data analysis are shown in Figure 4 of the manuscript.

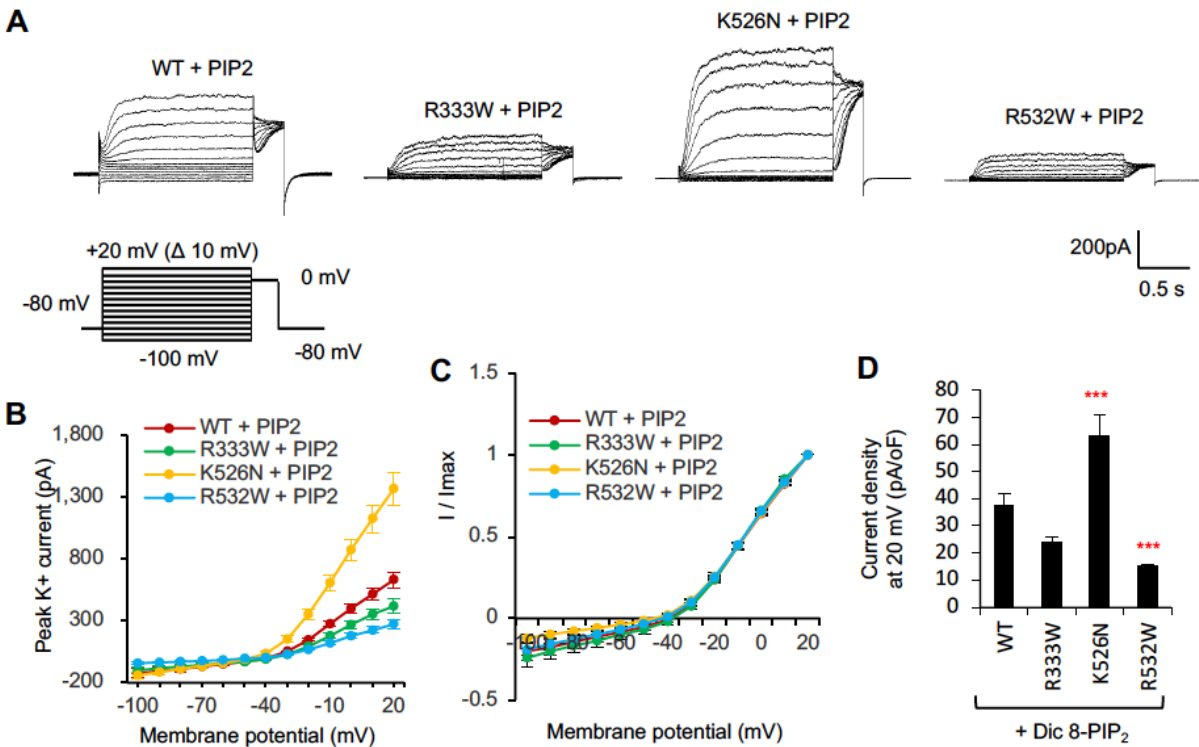

**Supplemental Figure 4. PIP<sub>2</sub> sensitivity of wild-type K<sub>v</sub>7.2 channels or mutant K<sub>v</sub>7.2 channels harboring epileptic encephalopathy mutations.** Whole cell voltage clamp recording of macroscopic K<sub>v</sub>7.2 currents from CHO hm1 cells were repeated in the presence of diC8-PIP<sub>2</sub> (100  $\mu$ M) in the intracellular solution. The CHO hm1 cells were transfected with GFP and K<sub>v</sub>7.2 WT or K<sub>v</sub>7.2 containing epileptic encephalopathy mutations (R333W, K526N, R532W). **(A)** Representative traces. **(B)** Average peak currents at all voltage steps. **(C)** Normalized current at all voltage steps. **(D)** Average peak current densities at +20 mV. Leak subtracted current traces and data analysis are shown in Figure 5 of the manuscript.

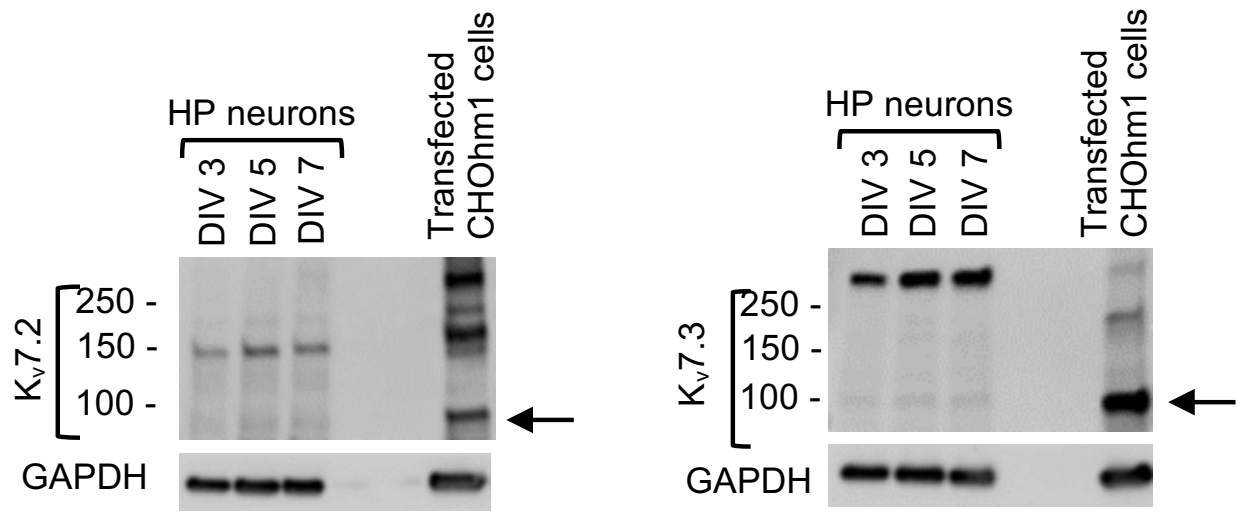

**Supplemental Figure 5. Immunoblot analysis of endogenous K<sub>v</sub>7.2 and K<sub>v</sub>7.3 proteins in cultured hippocampal neurons.** Total lysates from rat hippocampal cultured neurons at 3, 5, and 7 days in vitro (DIV) were subjected to immunoblotting with anti-K<sub>v</sub>7.2 and anti-K<sub>v</sub>7.3 antibodies (Alomone). Total lysates from CHO cells transfected with K<sub>v</sub>7.2 or K<sub>v</sub>7.3 were used as a positive control. GAPDH was used as a loading control. Arrows point to the monomers of K<sub>v</sub>7.2 or K<sub>v</sub>7.3.

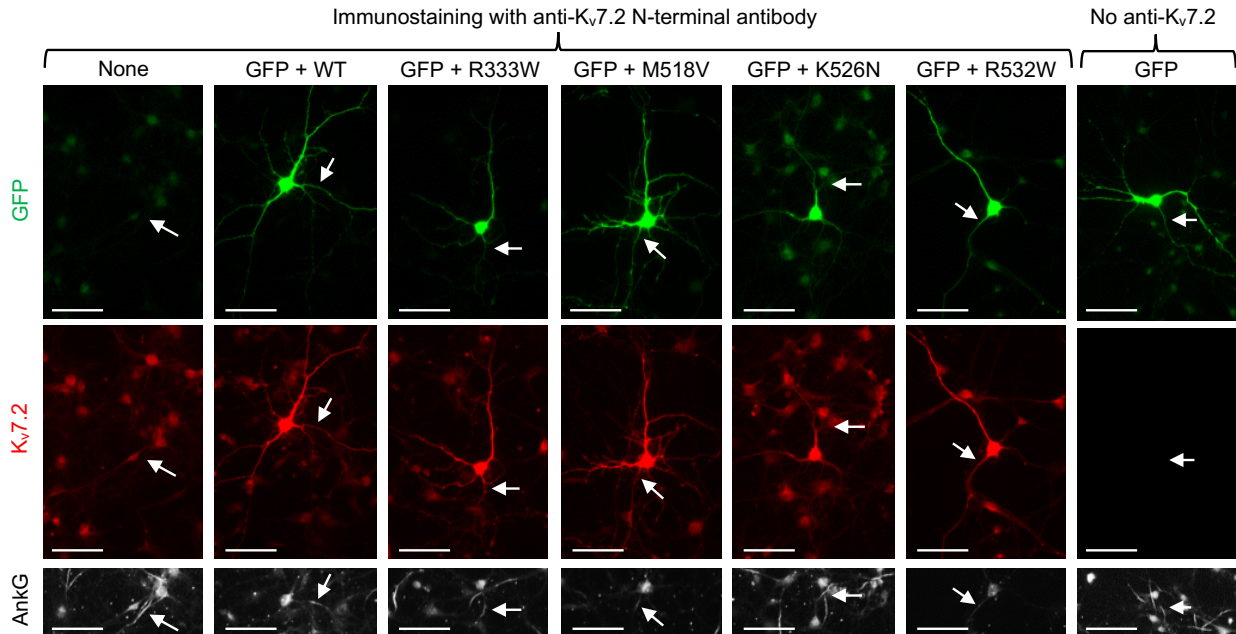

**Supplemental Figure 6. Expression of wild-type  $K_v7.2$  or mutant  $K_v7.2$  containing epileptic encephalopathy mutation in transfected hippocampal neurons.** Dissociated hippocampal cultured neurons were transfected with GFP only or together with  $K_v7.2$  WT or mutant  $K_v7.2$  harboring R333W, M518V, K526N, or R532W mutation. At 24 h post-transfection, untransfected and transfected neurons were immunostained with antibodies against  $K_v7.2$  N-termini and ankyrin-G (AIS marker). Arrows point to the AIS. Fluorescence images were obtained using the same exposure time. Immunostaining with anti- $K_v7.2$  N-terminal antibody revealed endogenous  $K_v7.2$  expression in untransfected hippocampal neurons whereas immunostaining in the absence of anti- $K_v7.2$  N-terminal antibody did not detect any  $K_v7.2$  expression (negative control – “No anti- $K_v7.2$ ” panels). In transfected neurons, anti- $K_v7.2$  N-terminal antibody detected both endogenous and transfected  $K_v7.2$  proteins. Scale bars: 50  $\mu\text{m}$ . Quantification of  $K_v7.2$  expression at the AIS is shown in Figure 6E of the manuscript.

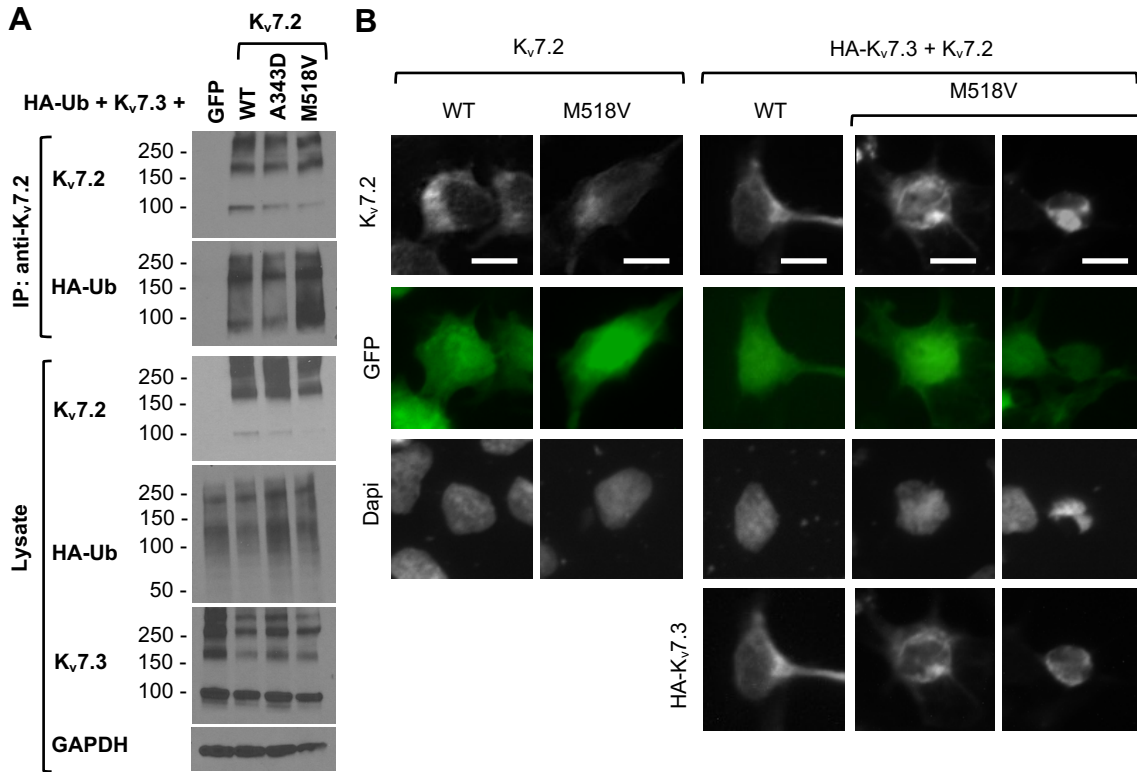

**Supplemental Figure 7. K<sub>v</sub>7.3 coexpression prevents degradation of K<sub>v</sub>7.2-M518V proteins.**

(A) Immunoprecipitation of K<sub>v</sub>7.2 from HEK293T cells cotransfected with HA-ubiquitin and K<sub>v</sub>7.3. The K<sub>v</sub>7.2-M518V proteins are ubiquitinated in the presence of K<sub>v</sub>7.3. (B) Immunocytochemistry of GFP-positive HEK293T cells cotransfected with K<sub>v</sub>7.2 WT or M518V alone, or together with HA-K<sub>v</sub>7.3. Scale bars: 10 μm. The M518V mutation decreases K<sub>v</sub>7.2 expression when expressed alone (left 2 panels). Presence of HA-tagged K<sub>v</sub>7.3 prevents reduction in expression of K<sub>v</sub>7.2-M518V, induces aggregation of K<sub>v</sub>7.2-M518V, and causes cell and nuclear shrinkage (right 3 panels). Quantification of K<sub>v</sub>7.2 expression and the number of cells that display cell and nuclear shrinkage are shown in Figure 8B-D.
